# Supplementary material
Source: PubMed Central journal article supplement (PMC7666065)
Supplement: NIHMS1635380-supplement-Online_Supplement.pdf [file NIHMS1635380-supplement-Online_Supplement.pdf]

## **IT COMES AS A SHOCK: KIDNEY REPAIR USING SHOCKWAVE THERAPY**

Nattawat Klomjit, M.D.<sup>1</sup>, Amir Lerman, M.D.<sup>2</sup>, Lilach O. Lerman M.D., Ph.D.<sup>1</sup>

<sup>1</sup>Division of Nephrology and Hypertension, Mayo Clinic, Rochester, Minnesota, USA

<sup>2</sup>Department of Cardiovascular Disease, Mayo Clinic, Rochester, Minnesota, USA

**Short title:** Shockwave therapy and kidney disease

### **Corresponding author**

Lilach O. Lerman M.D., Ph.D., Division of Nephrology and Hypertension, Mayo Clinic, 200 First St. SW, Rochester, MN 55905, USA

**Phone:** 507-293-0890

**Email:** lerman.lilach@mayo.edu

**Supplemental materials:** 3 supplemental tables

**Table S1. Type of shockwave generators**

| Type of generator | Characteristics                                                                                                                                                                                                                                              | Example of machines                                                                                                          |
|-------------------|--------------------------------------------------------------------------------------------------------------------------------------------------------------------------------------------------------------------------------------------------------------|------------------------------------------------------------------------------------------------------------------------------|
| Electrohydraulic  | An electrode generates an electrical spark between the tip and a water-filled semi-ellipsoid reflector, which subsequently focuses reflective wave to become a focused shock wave.                                                                           | Omnispec ED 1000 (Medispec, USA)<br>EvoTron R05 (High Medical Technologies, Switzerland)                                     |
| Electromagnetic   | A primary low-pressure acoustic pulse is generated by movement of a metal membrane away from the electromagnetic-coils. A primary wave then is focused either by acoustic lens (a plane wave) or a cylindrical condenser (a cylinder shaped metal reflector) | Duolith SD1 (Storz medical, Switzerland)<br>Renova (Direx System, Germany)<br>Modulith SLX-2 (Storz Medical AG, Switzerland) |
| Piezoelectric     | A high voltage pulse is applied to a spherical surface laid by a numerous piezoelectric crystals, which results in a low-pressure pulse in the surrounding water. This autofocusing does not need any reflector or condenser to focus the shockwave.         | Piezo Wave (Richard Wolf, Germany)                                                                                           |

**Table S2. Indications and contraindications for medical shock wave therapy**

| <b>Recommendations</b>                     | <b>Categories</b>           | <b>Conditions</b>                                                                                    |                                                        |
|--------------------------------------------|-----------------------------|------------------------------------------------------------------------------------------------------|--------------------------------------------------------|
| <b>Indications</b>                         |                             |                                                                                                      |                                                        |
| Approved standard indications              | Chronic tendinopathies      | Calcifying tendinopathy of shoulder<br>Lateral epicondylitis (Tennis elbow)                          |                                                        |
|                                            | Bone pathologies            | Stress fracture<br>Avascular bone necrosis without articular involvement<br>Delayed bone healing     |                                                        |
|                                            | Skin pathologies            | Delayed or non-healing wounds<br>Skin ulcers<br>Non-circumferential burn wounds                      |                                                        |
| Common empirically-tested clinical use     | Tendinopathies              | Rotator cuff tendinopathy<br>Foot and ankle tendinopathies                                           |                                                        |
|                                            | Bone pathologies            | Osgood Schlatter disease<br>Tibial stress syndrome                                                   |                                                        |
|                                            | Muscle pathologies          | Myofascial pain syndrome                                                                             |                                                        |
|                                            | Skin pathologies            | Cellulite                                                                                            |                                                        |
| Exceptional indications-expert indications | Musculoskeletal pathologies | Osteoarthritis<br>Dupuytren disease<br>Plantar fibromatosis<br>De Quervain disease<br>Trigger finger |                                                        |
|                                            |                             | Neurological pathologies                                                                             | Spasticity<br>Polyneuropathy<br>Carpal tunnel syndrome |
|                                            |                             | Urologic pathologies                                                                                 | Pelvic chronic pain syndrome                           |

|                          |                                          |                                                                                                                                                                                                                    |
|--------------------------|------------------------------------------|--------------------------------------------------------------------------------------------------------------------------------------------------------------------------------------------------------------------|
| Experimental indication  | Others                                   | Erectile dysfunction                                                                                                                                                                                               |
|                          | Others                                   | Peyronie disease<br>Lymphedema<br>Ischemic heart disease<br>Peripheral neuropathy                                                                                                                                  |
| <b>Contraindications</b> |                                          |                                                                                                                                                                                                                    |
|                          | Radial and focused waves with low energy | Malignant tumor in the treatment area<br>Fetus in the treatment area                                                                                                                                               |
|                          | High energy focused waves                | Lung tissue in the treatment area<br>Malignant tumor in the treatment area<br>Epiphyseal plate in the treatment area<br>Brain or spine in the treatment area<br>Severe coagulopathy<br>Fetus in the treatment area |

---

Adapted from the International Society for Medical Shockwave Treatment, 2016

**Table S3: Ongoing clinical trials of SW in treating parenchymal kidney disease**

| Clinical trials | Title                                                                                                                    | Estimated study completion date | Sample size | Kidney disease                                                  | Treatment                                                                                                                                                                           |
|-----------------|--------------------------------------------------------------------------------------------------------------------------|---------------------------------|-------------|-----------------------------------------------------------------|-------------------------------------------------------------------------------------------------------------------------------------------------------------------------------------|
| NCT02515461     | Low Energy ShockwaveTherapy (LE-SWT): A Novel Treatment for Chronic Kidney Disease                                       | January 2022                    | 30          | Diabetic kidney disease (eGFR 30-60 ml/min/1.73m <sup>2</sup> ) | MODULITH SLX-F2; 4 Hz (240 shocks/min) x 3000 SW/kidney STORZ MEDICAL AG.<br><br>Low energy shockwave on day 1,3,7,10,14 and 17 (total of 6 sessions in 3 weeks)                    |
| NCT03602807     | Safety and Effect of Low-Energy Extracorporeal Shockwave Therapy (ESWT) on the Renal Allograft in Transplant Recipients. | January 2020                    | 40          | Kidney transplant allograft                                     | STORZ DUOLITH® SD1 T-TOP "F-SW ultra"<br><br>Low energy shockwave for 2 treatments /week for 3 weeks; 4Hz x3000 SW/kidney; 0.20mJ/mm <sup>2</sup> applied over the kidney allograft |
| NCT03445247     | Extracorporeal Low-intensity Shockwave in diabetic Nephropathy                                                           | June 2020                       | 60          | Diabetic kidney disease (eGFR 15-60 ml/min/1.73m <sup>2</sup> ) | Omnispec; 2 Hz (120 shocks/min) x 1200 SW, 0.1 mJ/mm <sup>2</sup> session for 12 sessions.                                                                                          |
