# Supplementary material
Source: PubMed Central journal article supplement (PMC7666065)
Supplement: NIHMS1635380-supplement-Ref__permission_not_needed.pdf [file NIHMS1635380-supplement-Ref__permission_not_needed.pdf]

200 First Street SW  
Rochester, MN 55905  
507-284-2511

**Lilach O. Lerman, M.D., Ph.D.**  
Nephrology & Hypertension

October 5, 2020

Anna F. Dominiczak  
Editor-in-Chief  
*Hypertension*

Dear Dr. Dominiczak,

Thank you for the kind invitation to submit a revised version of a review article, entitled “It Comes as a Shock: Kidney Repair Using Shockwave Therapy,” for publication in *Hypertension*.

We would like to thank the editorial board and reviewers for the useful suggestions that have strengthened our manuscript. We have addressed all remaining concerns and questions.

Regarding references 40-47 in Table 1, they did not require the permission to reprint, because we created a table 1 that used factual data reporting in these references which we appropriately cited. We did not re-use or adapt the table 1 from these references. Moreover, none of each reference contributes to more than 75% of the content in the table 1.

Please find the revised invited manuscript enclosed. All the authors have read and approved the submission of the manuscript, which has not been published elsewhere and is not being considered for publication in another journal. We agree to pay for the cost of its publication.

Thank you for considering our review. We hope that you find it suitable for publication in *Hypertension*.

Sincerely yours,



Lilach O. Lerman, M.D., Ph.D.  
The Arthur M. and Gladys D. Gray Professor in Honor of Dr. Howard A. Andersen  
Professor of Medicine & Physiology  
Division of Nephrology and Hypertension
